# Supplementary material for: Rare copy-number variants as modulators of common disease susceptibility
Source: PubMed Central journal article supplement (PMC10773105; doi:10.1186/s13073-023-01265-5), 2024-01-08
Supplement: 13073_2023_1265_MOESM2_ESM.pdf [file 13073_2023_1265_MOESM2_ESM.pdf]

# Additional file 2: Supplemental Figures

## Rare copy-number variants as modulators of common disease susceptibility

Chiara Auwerx<sup>1,2,3,4,\*</sup>, Maarja Jõeloo<sup>5,6</sup>, Marie C. Sadler<sup>2,3,4</sup>, Nicolò Tesio<sup>1</sup>, Sven Ojavee<sup>2,3</sup>, Charlie J. Clark<sup>1</sup>, Reedik Mägi<sup>6</sup>, Estonian Biobank Research Team<sup>6,§</sup>, Alexandre Reymond<sup>1,#,\*</sup> & Zoltán Kutalik<sup>2,3,4,#,\*</sup>

<sup>1</sup> Center for Integrative Genomics, University of Lausanne, Lausanne, Switzerland

<sup>2</sup> Department of Computational Biology, University of Lausanne, Lausanne, Switzerland

<sup>3</sup> Swiss Institute of Bioinformatics, Lausanne, Switzerland

<sup>4</sup> University Center for Primary Care and Public Health, Lausanne, Switzerland

<sup>5</sup> Institute of Molecular and Cell Biology, University of Tartu, Tartu 51010, Estonia

<sup>6</sup> Estonian Genome Centre, Institute of Genomics, University of Tartu, Tartu 51010, Estonia

§ Estonian Biobank Research Team: Tõnu Esko, Andres Metspalu, Lili Milani, Reedik Mägi, Mari Nelis

# These authors jointly supervised this work.

### \* Correspondence:

Chiara Auwerx: [chiara.auwerx@unil.ch](mailto:chiara.auwerx@unil.ch);

Alexandre Reymond : [alexandre.reymond@unil.ch](mailto:alexandre.reymond@unil.ch);

Zoltán Kutalik: [zoltan.kutalik@unil.ch](mailto:zoltan.kutalik@unil.ch).

**Figure S1.** Case-control distribution in the UK and Estonian Biobanks.

**Figure S2.** BMI adjustment for possibly confounded CNV-disease associations.

**Figure S3.** Constraint analysis of disease associated CNV regions.

**Figure S4.** Total, corrected, and subset burden analysis.

**Figure S1: Case-control distribution in the UK and Estonian Biobanks**

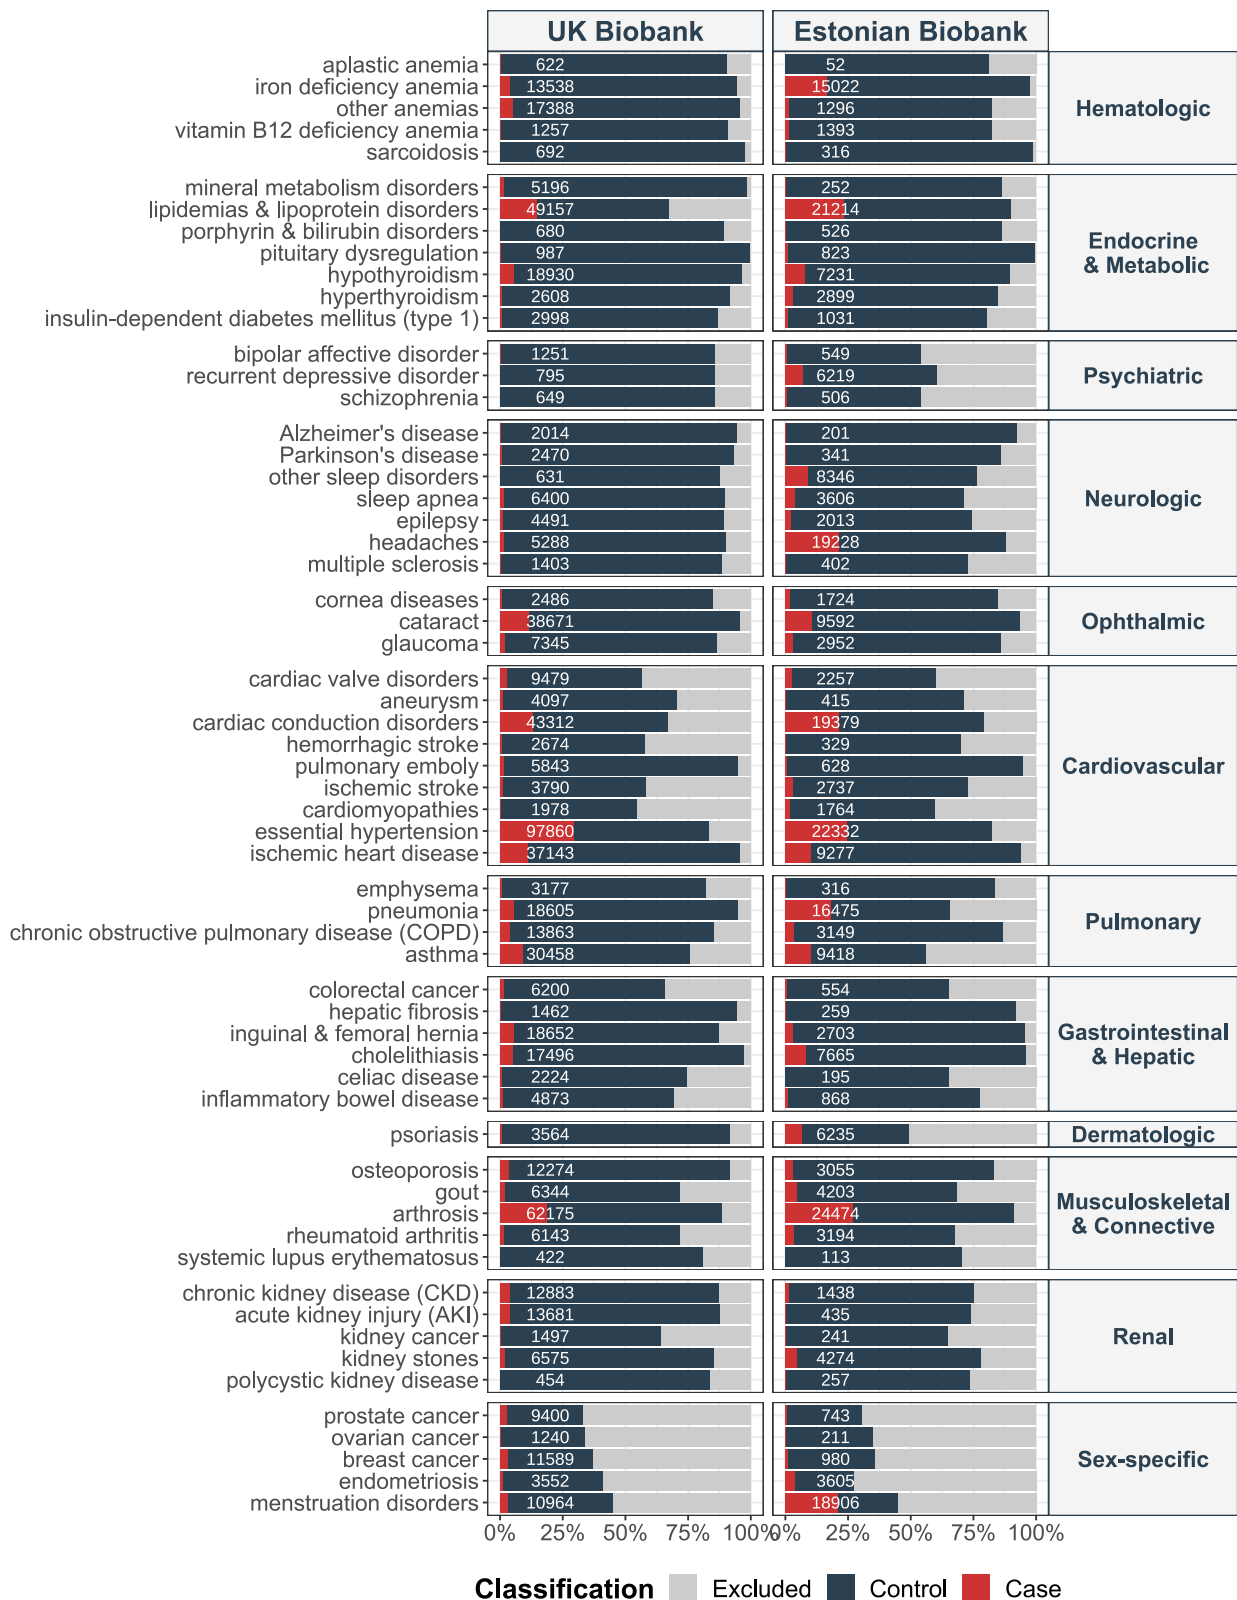

**Figure S1. Case-control distribution in the UK and Estonian Biobanks**

UK Biobank (left) and Estonian Biobank (right) percent stacked bar chart (x-axis) of cases (red), controls (dark gray), and excluded (gray) individuals, for each of the 60 assessed diseases (y-axis; left) categorized according to their ICD-10 chapter (y-axis; right). Case count is indicated in white on each bar.

**Figure S2: BMI adjustment for possibly confounded CNV-disease associations**

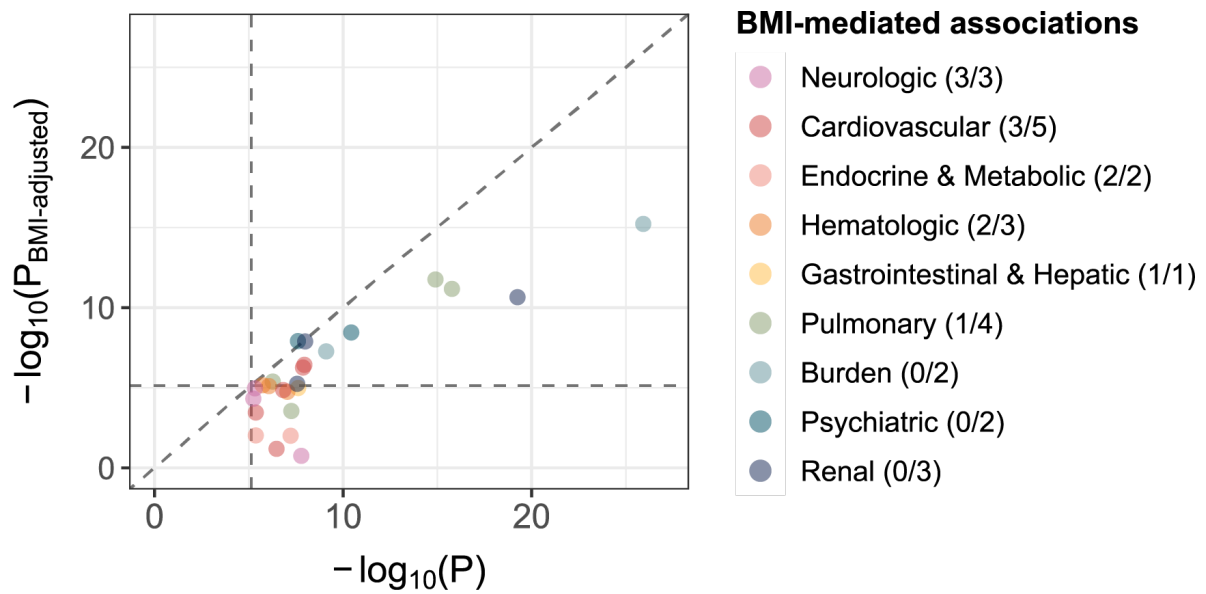

**Figure S2. BMI adjustment for possibly confounded CNV-disease associations.**

Negative logarithm of CNV-disease association p-value with (y-axis) and without (x-axis) adjustment for body mass index (BMI) for the 25 CNV-GWAS signals potentially confounded by the latter. The horizontal and vertical dashed lines represent the genome-wide significance threshold at  $p \leq 7.5 \times 10^{-6}$ ; the diagonal dashed line represents the identity line. Associations are colored by ICD-10 chapter, with the number of associations that fail to reach genome-wide significance upon adjustment for BMI indicated in parenthesis.

**Figure S3: Constraint analysis of disease associated CNV regions**

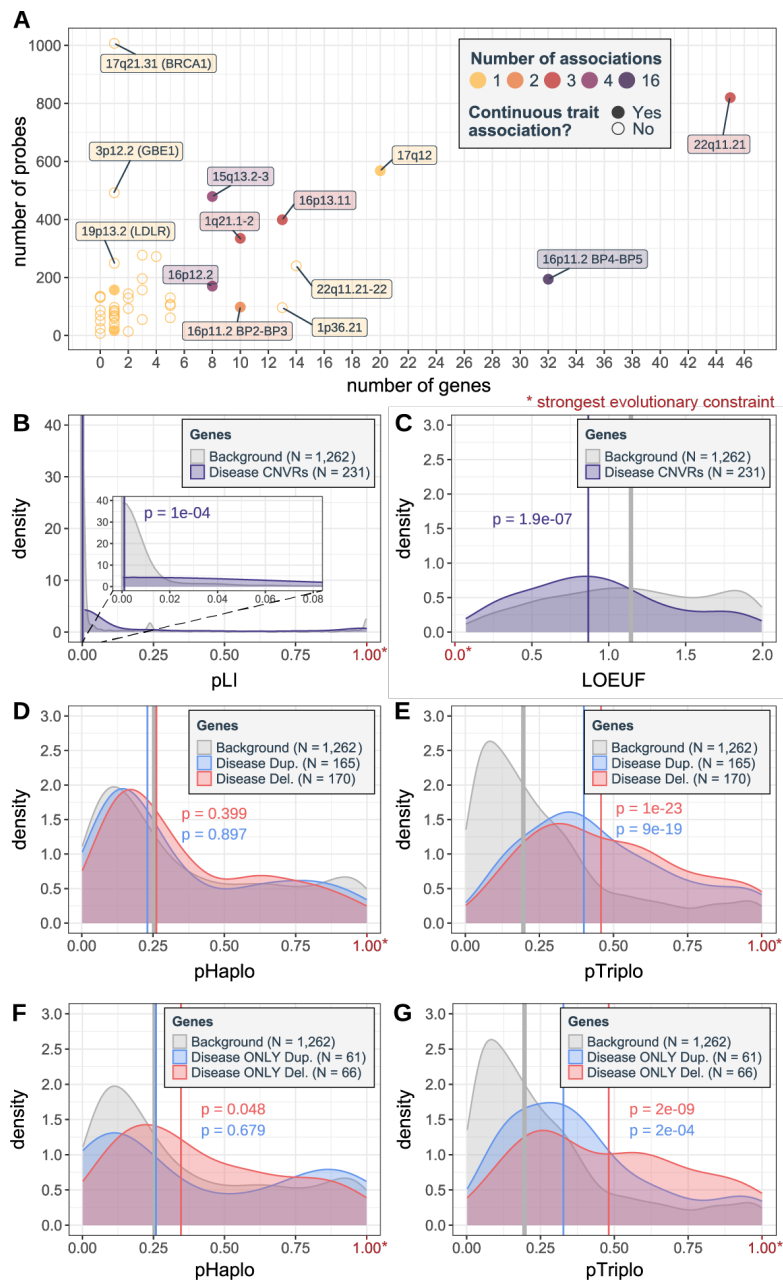

**Figure S3. Constraint analysis of disease associated CNV regions**

(A) Number of probes (y-axis) versus number of affected genes (x-axis) for disease associated CNV regions (CNVRs). Color reflects the number of associations, with full circles indicating previous association with continuous traits [1]. CNVRs affecting  $\geq 6$  genes or single-gene CNVR affecting  $> 200$  probes are labeled with cytogenic bands. (B-G) Evolutionary constraint of CNVR-encompassed genes (i.e., “disease genes”): Distribution of (B) pLI and (C) LOEUF scores for disease genes versus background genes (i.e., genes overlapping regions with a CNV frequency  $\geq 0.01\%$  but no disease association). Distribution of (D) pHaplo and (E) pTriplo scores for genes overlapping CNVRs significantly associated with a disease through the duplication-only or deletion-only models versus background genes. Distribution of probability of (F) pHaplo and (G) pTriplo scores for genes overlapping CNVRs *uniquely* associated to a disease through the duplication-only or deletion-only model versus background genes. Number of genes (N) and the median score (vertical line) is indicated for each group. P-values compare groups versus background gene medians (two-sided Wilcoxon test). Direction of strongest evolutionary constraint is indicated in red with a star.

1. Auwerx C, Lepamets M, Sadler MC, Patxot M, Stojanov M, Baud D, et al. The individual and global impact of copy-number variants on complex human traits. *Am J Hum Genet.* 2022;109:647–68.

**Figure S4: Total, corrected, and subset CNV burden analysis**

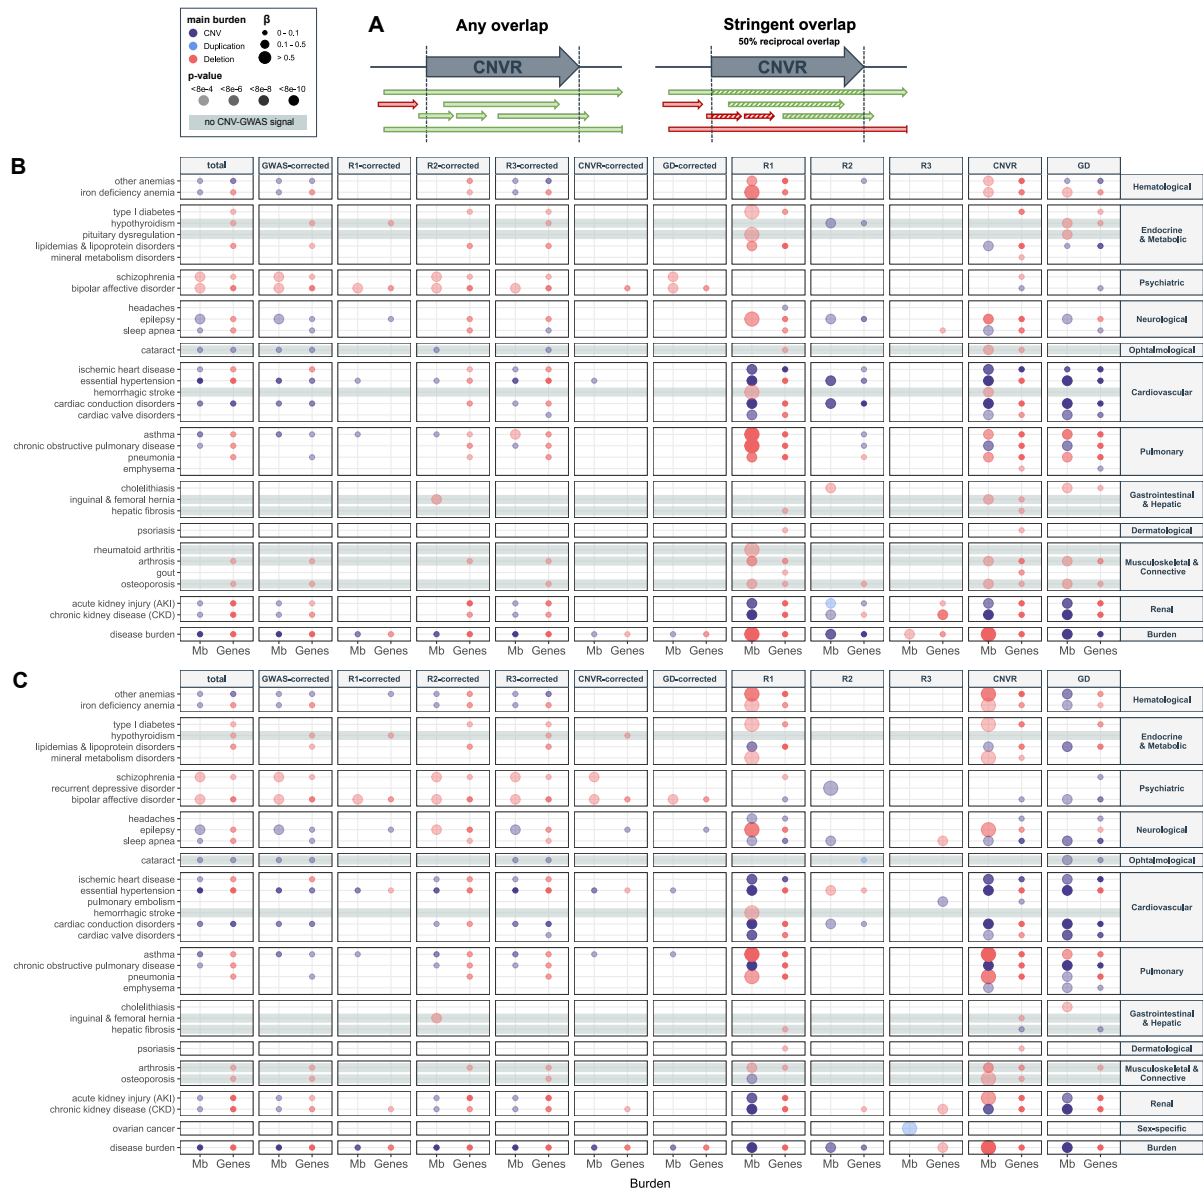

**Figure S4. Total, corrected, and subset CNV burden**

(A) Schematic representation of two ways to define overlap between a CNV and a CNV region (CNVR) in a given genomic partition. Left: Any overlap of  $\geq 1$  bp is sufficient to consider that the CNV overlaps the region. Right: a reciprocal 50% base pair overlap is required (stripes) to consider that the CNV overlaps the region, so that the CNV covers  $> 50\%$  of the region defined by the partition and the region defined by the partition covers  $> 50\%$  of the CNV. CNVs considered as overlapping are depicted in green, those that are not in red. CNVs with blunted arrows extend over a range longer than the depicted CNVR. (B-C) Contribution of the total CNV burden, the GWAS-corrected burden, as well as the total CNV burden corrected for the 5 considered genomic partitions (i.e., R1, R2, R3, CNVR, GD) and the subset burden of the same 5 genomic partitions in number of affected Mb (x-axis; left) or genes (x-axis; right) to disease risk (y-axis) using (B) any or (C) a stringent approach to define overlap, as depicted in (A). Only the most significantly associated of the CNV (purple), duplication (blue), or deletion (red) burdens, providing  $p \leq 0.05/61 = 8.2 \times 10^{-4}$ , is shown. Color indicates whether the CNV (duplication + deletion), duplication, or deletion burden was most significantly associated, with size and transparency being proportional to the effect size (beta) and p-value, respectively. Gray horizontal bands mark traits with no CNV-GWAS signal.
